# Supplementary material
Source: Springer Nature journal article supplement (https://www.springermedizin.de/resource/supplementary/12979_2008_55_MOESM1_ESM.pdf/9603262)

**Genetic**

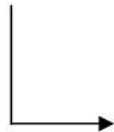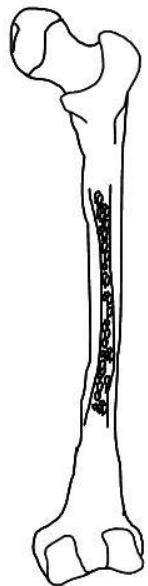

**Environment**

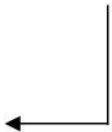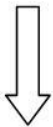

- Higher HSC numbers
- Lower DNA repair
- Lower activity per cell

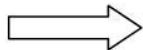

- Lower B cells
- Higher myeloid cells
- Lower T cell progenitors

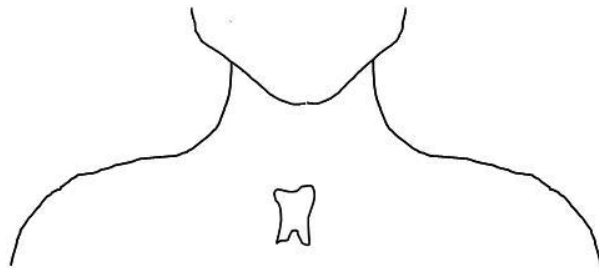

Lower recent thymic emigrant  
(naive T cells)

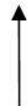

Sex steroids contributing  
to thymic involution

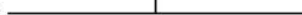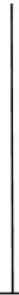

Supplement: MOESM1 [file 9603262]
